# Supplementary material for: Generation of functionally distinct isoforms of PTBP3 by alternative splicing and translation initiation
Source: PubMed Central journal article supplement (PMC4477659; doi:10.1093/nar/gkv429), 2015-05-04
Supplement: supp_gkv429_nar-00043-a-2015-File008.pdf [file supp_gkv429_nar-00043-a-2015-File008.pdf]

**AUG1** **AUG4**

PTBP3 MDGVVTDLITVGLKRGSDELLSSGIINGPFT-MNSSTPSTGVYANGNDSKKFKRD-RPPCS 59  
PTBP1 MDGIVPD-IAVGTKRGSDELFSTCVTNGPFI-MSSNSASA---ANGNDSKKFKGDERSAGV 56  
PTBP2 MDGIVTE-VAVGVKRGSDELLSGSVLSSPNSNMSSMV----VTANGNDSKKFKGEDKMDGA 56  
\*\*\*:\*.:.: :\*: \* : \* : \* : \* : \* : \* : \* : \* : \* : \*

**AUG11**

PTBP3 PSRVLHLRKIPCDVTEAEIISLGLPFGKVTNLLMLKGKSQAFLEMASEEAAVTMVNYTTP 119  
PTBP1 PSRVIHIRKLPIDVTEGEVVISLGLPFGKVTNLLMLKGKNQAFIEMNTEEAANTMVNYTTP 116  
PTBP2 PSRVLHIRKLPGEVTETEVIALGLPFGKVTNLLMLKGKNQAFLELATEEAAITMVNYTTP 116  
\*\*\*:\*.:.: :\*: \* : \* : \* : \* : \* : \* : \* : \* : \* : \*

PTBP3 ITPHLRSQPVYIQYNSHRELKTDNLPNQARAQAAQAVSAVQSGSLALSG--GPSNEGTV 177  
PTBP1 VTPVLRGQPIYIQYNSHRELKTDSSPNQARAQAAQAVNSVQSGNLALAAASAAVDAGMA 176  
PTBP2 VTPHLRNQPIYIQYNSHRELKTDNLTNQ-RAQAVLQAVTAVQTANTPLSG--TTVSESAV 173  
\*: \* : \* : \* : \* : \* : \* : \* : \* : \* : \* : \* : \* : \* : \* : \*

PTBP3 LPGQSPVLRIIENLFYVPTLEVLHQIFSKFGTVLKIITFTKNNQFQALLQYADPVNAHY 237  
PTBP1 MAGQSPVLRIVENLFYVPTLDVLHQIFSKFGTVLKIITFTKNNQFQALLQYADPVSAQH 236  
PTBP2 TPAQSPVLRIIDNMYYPVPTLDVLHQIFSKFGAVLKIITFTKNNQFQALLQYADPVNAQQ 233  
. . \* : \* : \* : \* : \* : \* : \* : \* : \* : \* : \* : \* : \* : \* : \* : \*

PTBP3 AKMALDQONIYNACCTLRIDFSKLTSLNVKYNNDKSRDFTRLDLPTGDGQPSLEPPMAAA 297  
PTBP1 AKLSLDQONIYNACCTLRIDFSKLTSLNVKYNNDKSRDYTRPDLPSGDGQPSLDQTMAAA 296  
PTBP2 AKLALDQONIYNACCTLRIDFSKLTSLNVKYNNDKSRDYTRPDLPSGDGQPALDPAIAAA 293  
\* : \* : \* : \* : \* : \* : \* : \* : \* : \* : \* : \* : \* : \* : \* : \*

PTBP3 FGAPGIIS-SPYAGAAGFAPAIGFPQATGLSVPVAVPGALGPLTITSS-----AVTGRMA 350  
PTBP1 FGAPGIISASPYAG-AGFPPTFAIPQAAGLSVNVHGHALAPLAIPSAAAA--AAAGRIA 353  
PTBP2 F-----AKETSLAVPGALSPLAIPNAAAAAAAAAAGRVG 328  
\* \* : \* : \* : \* : \* : \* : \* : \* : \* : \* : \* : \* : \* : \*

PTBP3 IPGASGIPGNSVLLVTNLNPDLITPHGLFILFGVYGDVHRVKIMFNKKNALVQMADANQ 410  
PTBP1 IPGLAG-AGNSVLLVSNLNPPERVTPQSLFILFGVYGDVQRVKILFNKKNALVQMADGNQ 412  
PTBP2 MPGVSA-GGNTVLLVSNLNEEMVTPQSLFTLFGVYGDVQRVKILYNKKDSALIQMADGNQ 387  
\*: \* : \* : \* : \* : \* : \* : \* : \* : \* : \* : \* : \* : \* : \*

PTBP3 AQLAMNHLSGQRLYKGLRATLSKHQAVQLPREGQEDQGLTKDFSNSPLHRFKKPGSKNF 470  
PTBP1 AQLAMSHLNGHKLHGKPIRITLSKHQNVQLPREGQEDQGLTKDYGNSPLHRFKKPGSKNF 472  
PTBP2 SQLAMNHLNGQKMYGKTIRVTLTKHQTVQLPREGLDDQGLTKDFGNSPLHRFKKPGSKNF 447  
\*: \* : \* : \* : \* : \* : \* : \* : \* : \* : \* : \* : \* : \* : \*

PTBP3 QNIFPPSATLHLSNIPPSVTVDDLKNLFIEAGCSVKAFKFFQKDRKMALIQLSVEEAIQ 530  
PTBP1 QNIFPPSATLHLSNIPPSVSEEDLKVLFSNNGGVVKGFKFFQKDRKMALIQMSVEEAVQ 532  
PTBP2 QNIFPPSATLHLSNIPPSVAEEDLRTLFANTGGTVKAFKFFQ-DHKMALLQMATVEEAIQ 506  
\* : \* : \* : \* : \* : \* : \* : \* : \* : \* : \* : \* : \* : \* : \*

PTBP3 ALIELHNHDLGENHHLRVSFSKSTI 555  
PTBP1 ALIDLHNHDLGENHHLRVSFSKSTI 557  
PTBP2 ALIDLHNYNLGENHHLRVSFSKSTI 531  
\* : \* : \* : \* : \* : \* : \* : \* : \* : \* : \* : \* : \* : \* : \*

**Supplementary Fig 1.** ClustalW2 alignment of human PTBP3 (ROD1), PTBP1 and PTBP2 (nPTB). The PTB paralogs share the same domain organization and a high degree of sequence identity. The RRM3-4 interdomain linker are also highly conserved. Also indicated are the conserved bipartite NLS (red) with the overlapping PKA phosphorylation site (underlined), the NES (boxed). Secondary structural elements in RRM3-4 are shaded grey ( $\beta$ -strands) and yellow ( $\alpha$  helices). Internal methionines initiating the truncated PTBP3 isoforms identified here are shown in red, and indicated above by “\*”, AUG4 and AUG11. Amino acids identical between all three proteins are indicated by “\*”, the conserved substitutions by “:” and the semi-conserved ones with “.”.

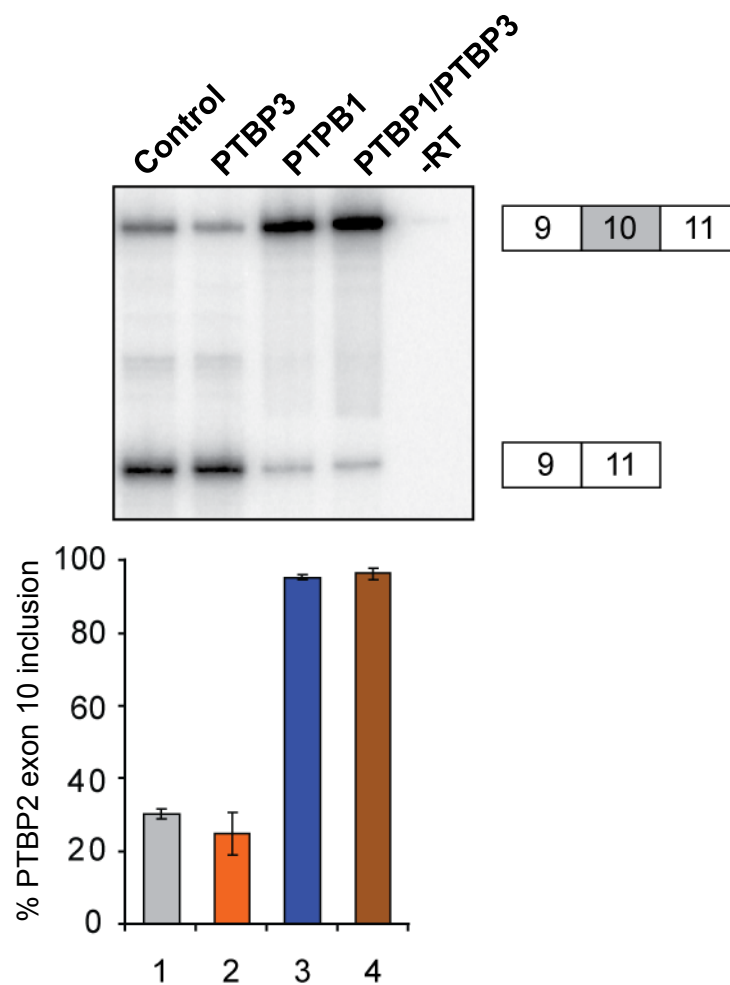

**Supplementary Figure 2. Crossregulation of PTBP2 exon 10.**

RT-PCR of PTBP2 exon 10 splicing in K-562 cells with PTBP1 and PTBP3 knockdown. Samples were analyzed in triplicate and the averages are plotted with standard deviation error bars. The levels of exon 10 inclusion were significantly different in lanes 3 and 4 compared to lanes 1 and 2 ( $p < 0.05$ ), but not between lanes 1 & 2 or 3 & 4.

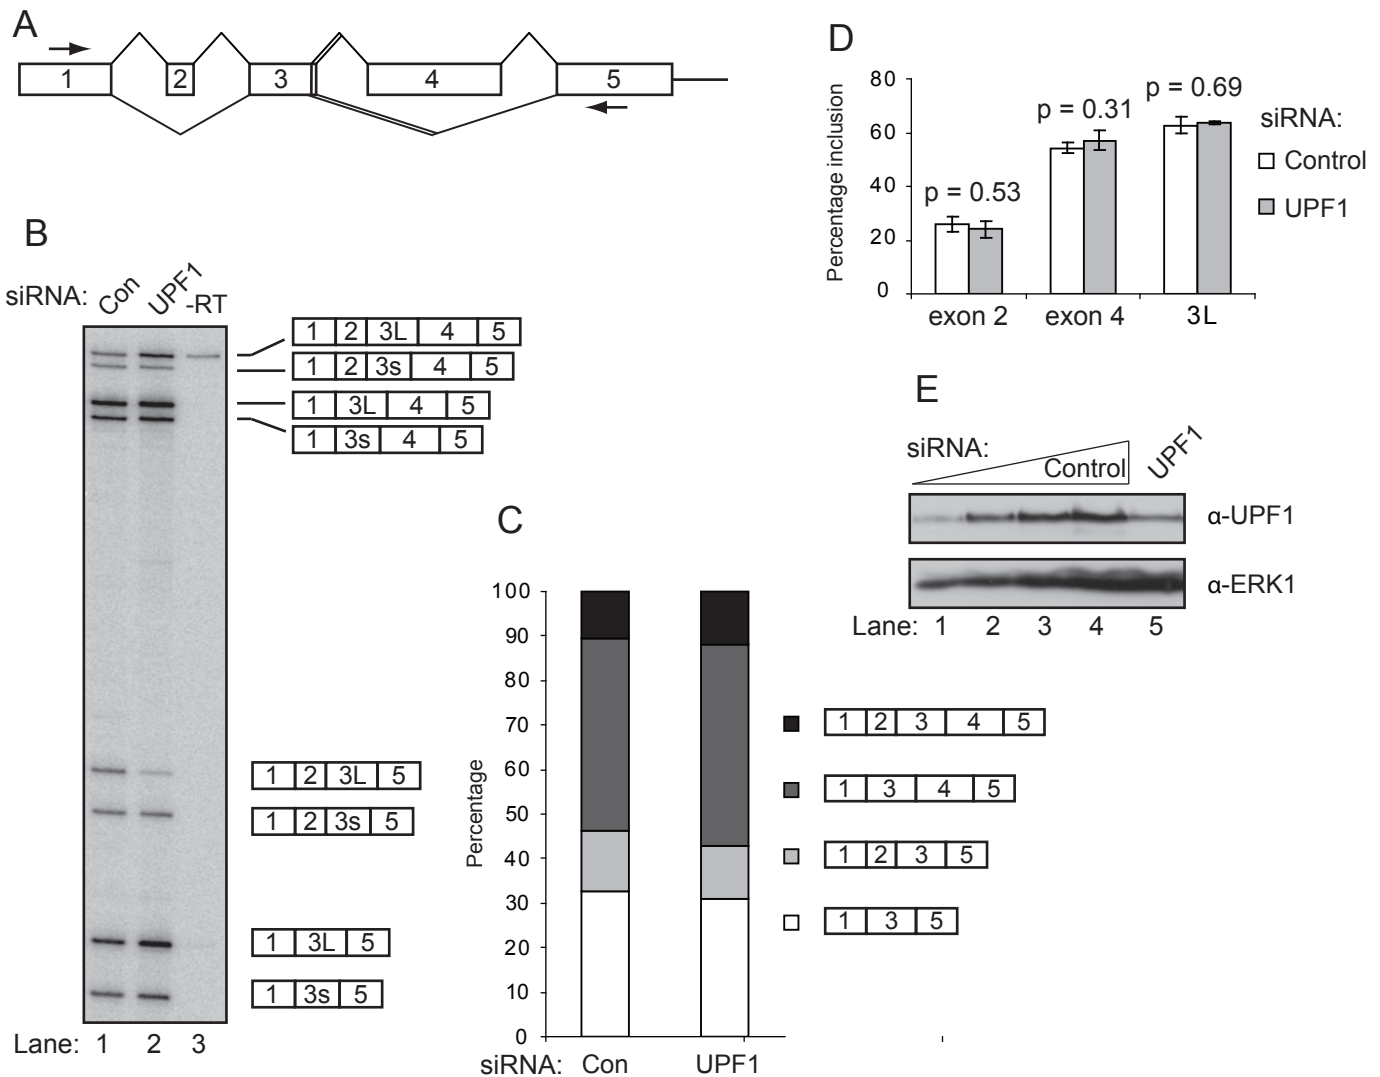

**Supplementary Figure 3. *PTBP3* mRNA isoforms are not sensitive to inhibition of Nonsense Mediated Decay by *UPF1* knockdown.**

A) Schematic of exon arrangement and alternative splicing events at 5' end of *PTBP3* gene.

B) RT-PCR of *PTBP3* mRNA in K562 cells using PCR primers in exons 1 and 5 after treatment with control siRNA (lane 1) or *UPF1* siRNA (lane 2).

C) Quantitation of data from B to indicate the proportions of mRNA isoforms with exon 2 and/or exon 4 skipped.

D) Quantitation of data from B to indicate the percentage inclusion of exon 2, exon 4 and the 3L 5' ss. None of the events are sensitive to *UPF1* knockdown.

E) Western blot of *UPF1* knockdown. Lanes, 3, 2, 1: 2-fold dilutions of the control siRNA treated sample in lane 4.

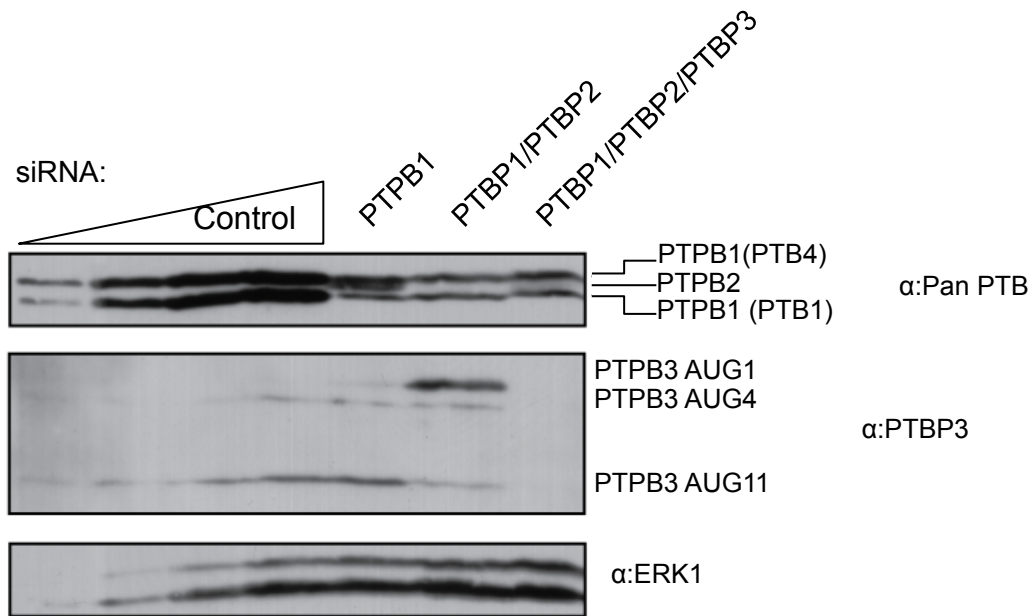

**Supplementary Figure 4.** Western blot analysis of HeLa cell lysates (40  $\mu$ g total protein) after siRNA knockdown of combinations of PTBP1, PTBP2 and PTBP3. PTBP1 and PTBP2 were detected using a polyclonal pan-PTB antibody, PTBP3 was detected with the PTBP3 antibody and ERK1 was detected for a loading control. Control lanes contain 1:8, 1:4, 1:2, 1:1 dilutions for estimation of knockdown efficiency.

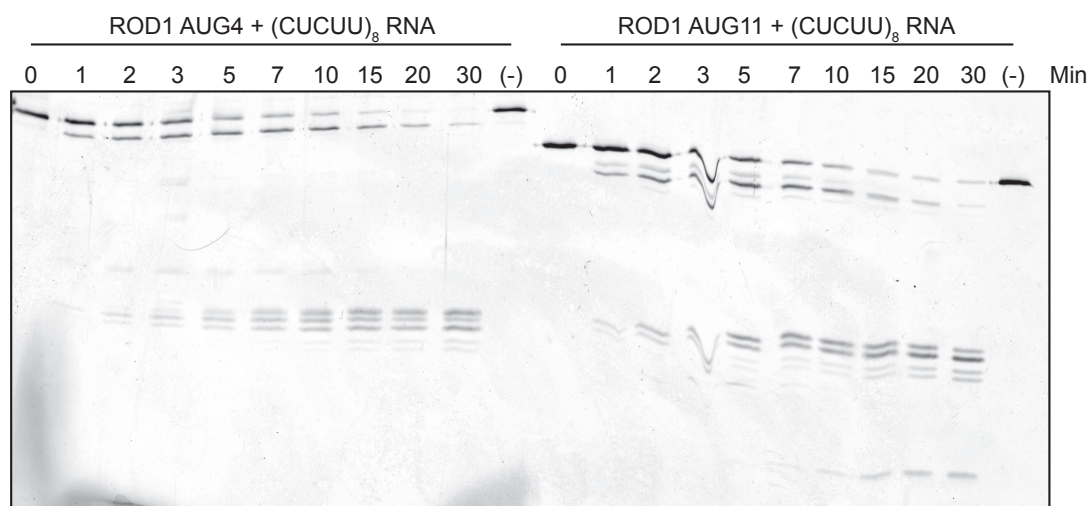

**Supplementary Figure 5. Partial chymotryptic digestion of ROD1 proteins in the presence of RNA**

SDS-PAGE gels comparing chymotryptic digestion patterns over a 30-minute time course for PTBP3 AUG4 and AUG11 protein in the presence of (CUCUU)<sub>8</sub> RNA at a RNA:protein molar ratio of 2:1. The (-) lane is a negative control where no chymotrypsin was added to the reaction.

# Mouse B cells

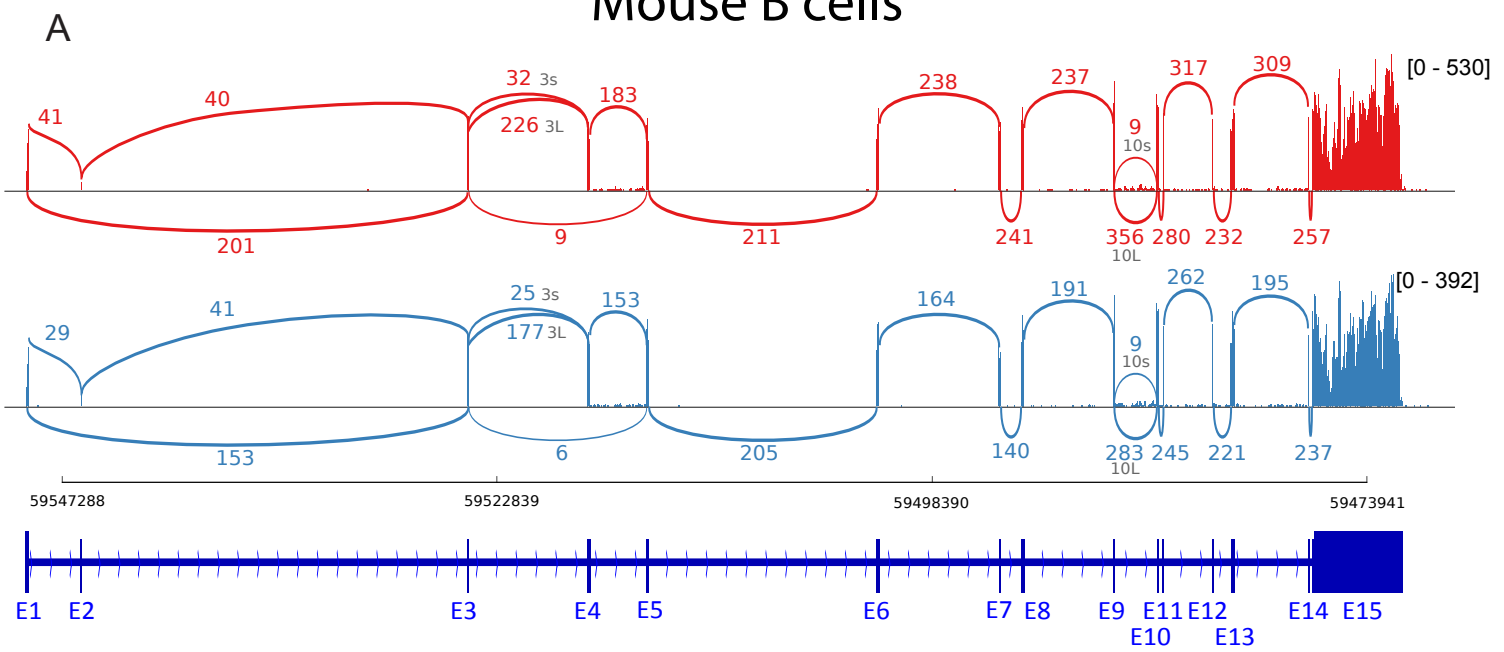

**B**

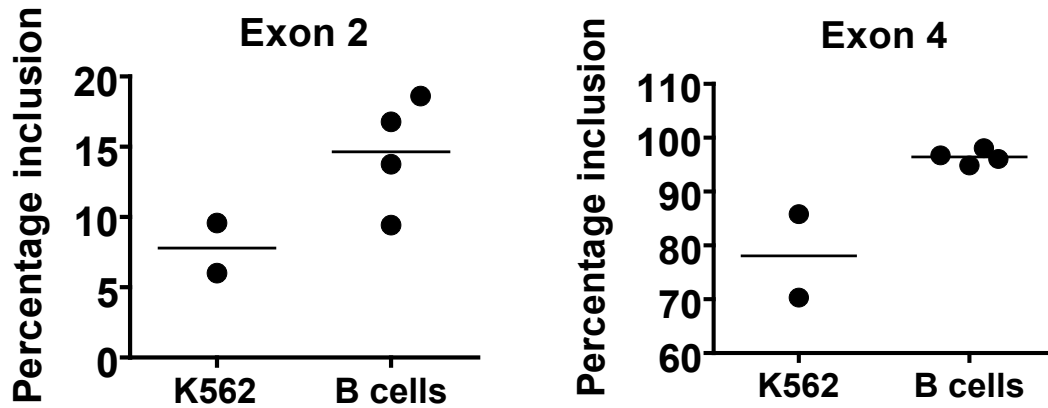

## Supplementary Figure 6. Ptp3 alternative splicing in mouse B-cells.

A) Shashimi plots for Ptp3 of two RNAseq libraries from mouse B cells. Numbers above the arcs indicate the number of reads mapping across two exons. In addition to the alternative splicing events observed in K562 cells, two alternative 3' splice sites were observed in exon 10 separated by 15 nucleotides. Both 3' splice sites are in frame. Selection of the downstream splice site results in the deletion of a GLSVP pentapeptide in the linker between RRM2 and 3.

B) Quantitation from data shown in panel A (mouse B-cells) and Fig. 1A (K562 cells). Each dot shows percentage of inclusion calculated from one RNAseq library. Reads including the exon were calculated by summing the reads including the upstream and downstream exons and dividing by 2. For exon 4 no distinction was made for whether the reads were from transcripts using the upstream or downstream 5'ss of exon 3.

A

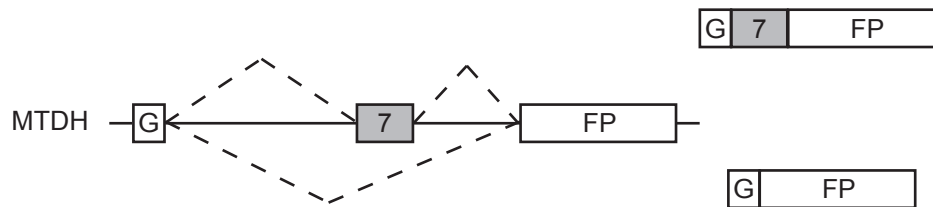

B

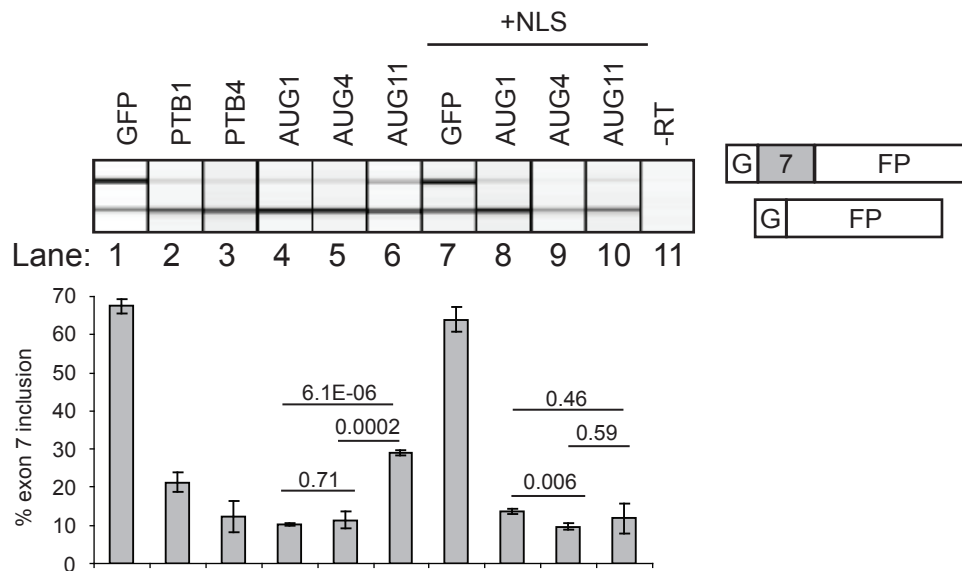

## Supplementary Figure 7. PTBP3 isoforms act as repressors of MTDH exon 7

A) Schematic of MTDH exon 7 minigene.

B) Qiaxcel gel-image of RT-PCR of MTDH minigene cotransfected with GFP, as a negative control (lanes 1,7) with the PTB1 and PTB4 isoforms of PTBP1 (lanes 2, 3), and with the AUG1, AUG4 and AUG11 isoforms of PTBP3 (lanes 4-6, 8-10). Constructs in lanes 7-10 have an additional nuclear localization signal (NLS). Lane 11 is a minus reverse transcription (-RT) negative control. P-values are shown for pair-wise comparison of PTBP3 isoforms.

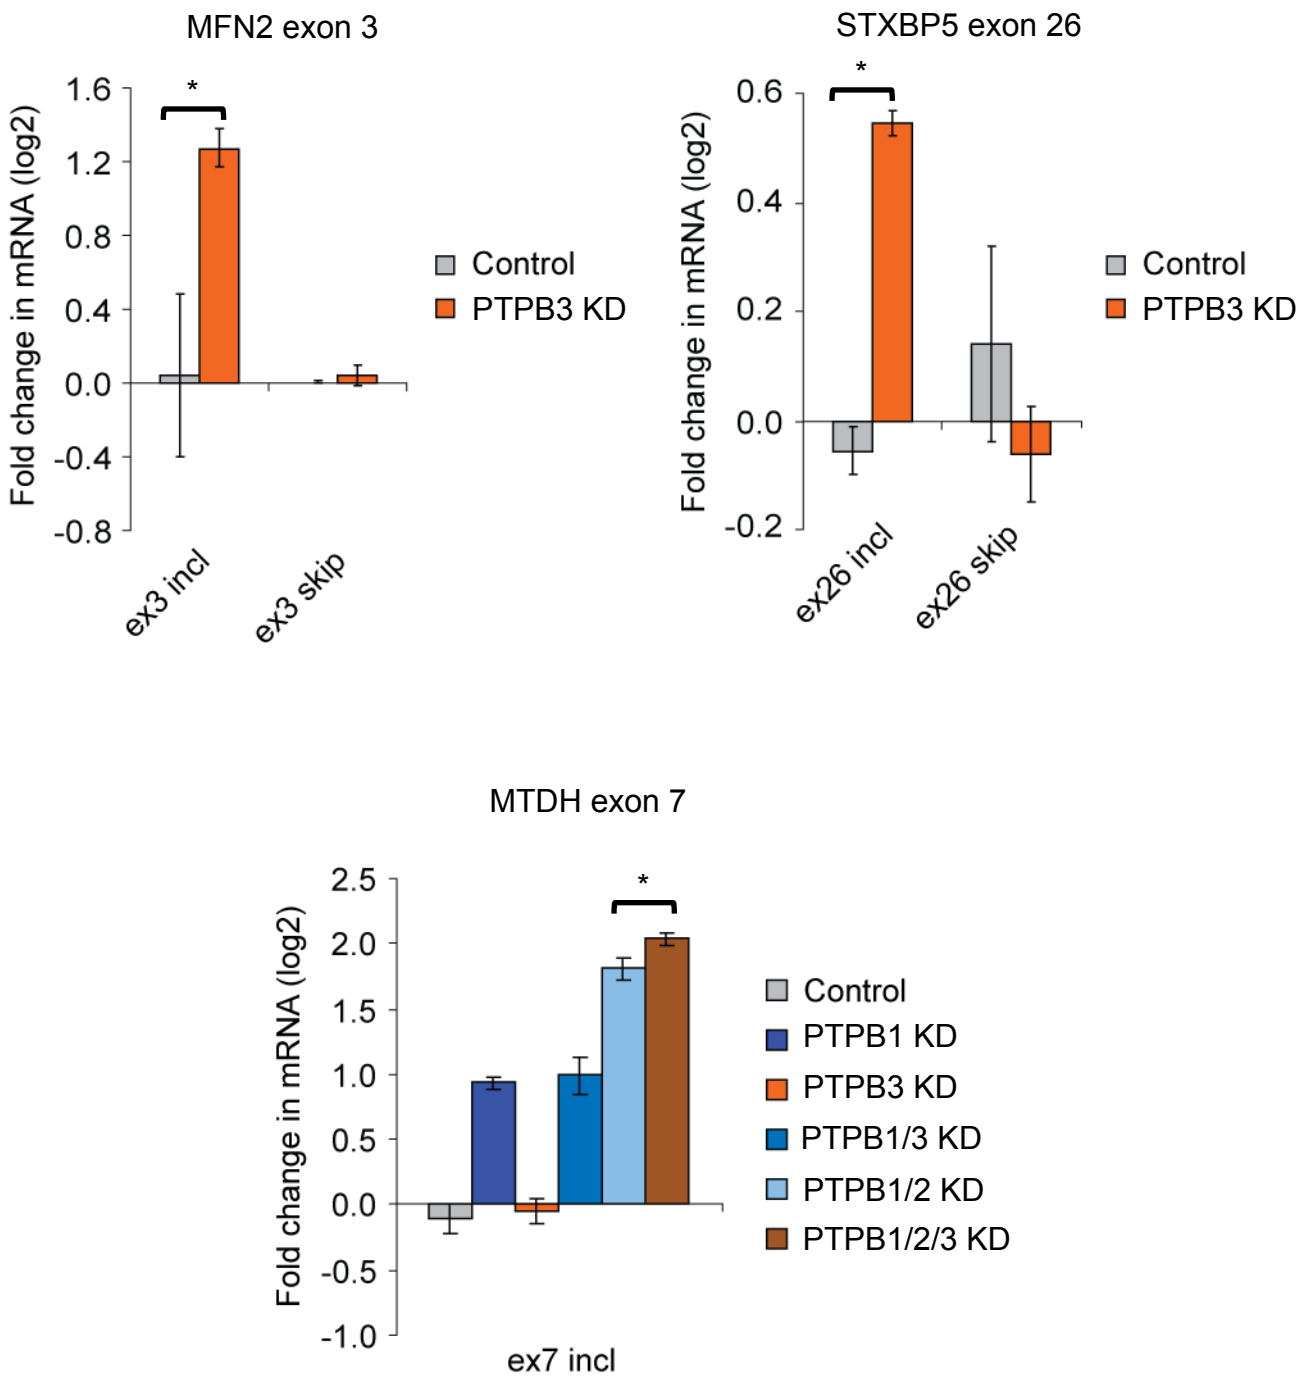

**Supplementary Figure 8. Real time RT-PCR analysis of PTBP3 splicing targets in K562 cells.**

A) MFN2 exon 3, B) STXBP5 exon 26, C) MTDH exon 7 inclusion  
 Samples were analysed in triplicate and the average mRNA levels normalized to HPRT mRNA are plotted with standard deviation error bars. To show fold change, log<sub>2</sub> values are plotted. Asterisks indicate significant changes upon PTBP3 knockdown (p < 0.05).



| Gene   | Alternative splicing event | Cell line tested | Response to PTPB3 KD |
|--------|----------------------------|------------------|----------------------|
| PTBP3  | Exon 2                     | K-562            | Triple - No          |
| MFN2   | Exon 3                     | K-562            | Single - Yes         |
| TPM2   | ME exons 6 & 7             | K-562, HeLa      | Triple - No          |
| TPM2   | Alt terminal exons 10 & 11 | K-562, HeLa      | Triple - No          |
| ANXA7  | Exon 6                     | K-562, HeLa      | Triple - No          |
| PKM2   | ME exons 9 & 10            | K-562, HeLa      | Triple - No          |
| LIMCH1 | Exon 36                    | K-562            | Single - No          |
| MAP4K4 | Exon 16                    | K-562            | Single - No          |
| USP5   | Alt 5' ss in exon 15       | K-562            | Single - No          |
| TCF12  | Exon 16                    | K-562            | Single - No          |
| STXBP5 | Exon 26                    | K-562            | Single - Yes         |
| GLE1L  | Exon 10                    | K-562            | Single - No          |
| TUBB   | Alt poly A site            | K-562            | Single - No          |
| MACF1  | Exon 99                    | K-562            | Single - No          |
| MTDH   | Exon 7                     | K-562            | Triple - Yes         |
| PDLIM5 | Alt terminal exon 11       | K-562            | Single - No          |
| CRYZL1 | Exon 2                     | K-562            | Single - No          |

**Supplementary Table 1.** Seventeen known PTBP1/PTBP2 regulated splicing events from Llorian et al. 2010 were tested for their response to knockdown of PTBP3 alone compared to control (“single” in column 4), or triple knockdown of PTBP1/PTBP2/PTBP3 compared to PTBP1/PTBP2 (“triple” in column 4). Only three events responded significantly ( $p < 0.05$ , indicated by “Yes”), for which data are shown in Supplementary Figure 8.
